# Supplementary material
Source: HighWire-hosted journal article supplement (https://genesdev.cshlp.org/content/suppl/2014/03/13/28.6.576)
Supplement: Supplemental_Data.pdf [file Supplemental_Data.pdf]

Figure S1

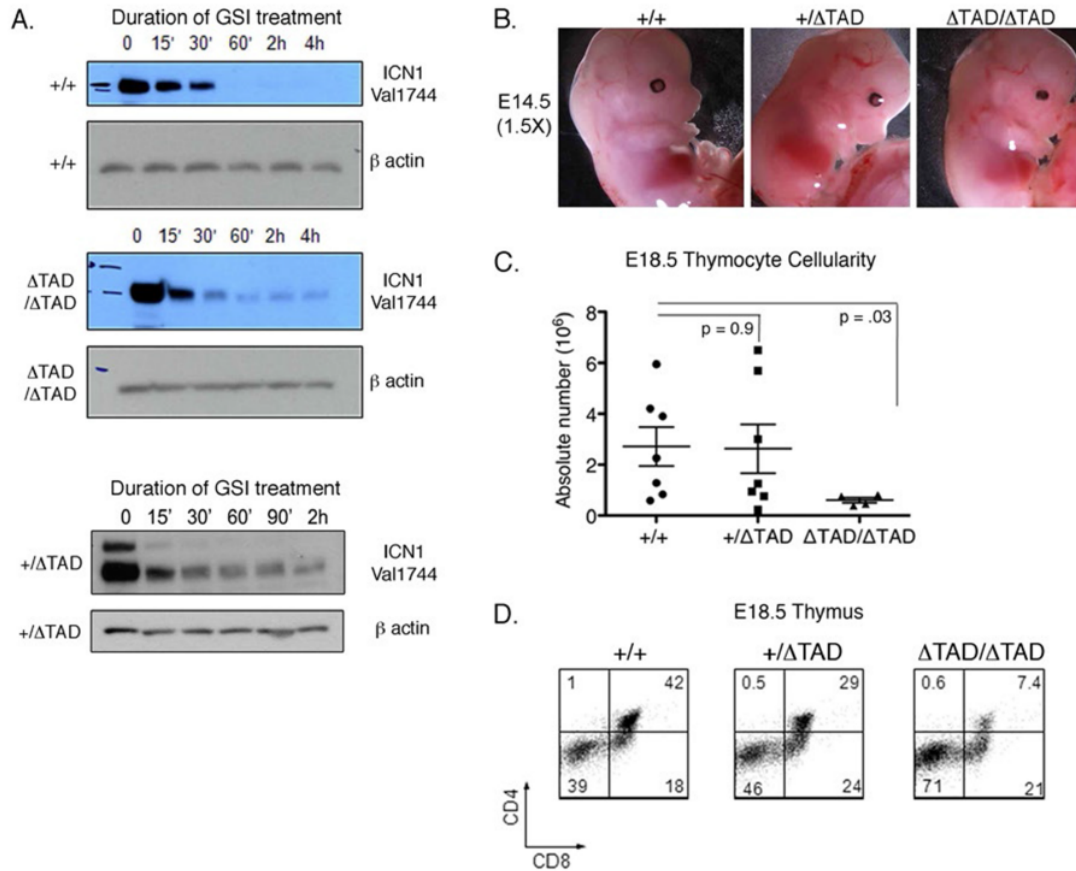

**Figure S1. Characterization of  $\Delta$ TAD protein and gross embryonic development of  $\Delta$ TAD/ $\Delta$ TAD embryos.**

**(A)** Deletion of the Notch1 TAD decreases Notch1 turnover. MEFs from +/+,  $\Delta$ TAD/ $\Delta$ TAD, or +/ $\Delta$ TAD were plated in equal numbers and subsequently treated with gamma secretase inhibitors (GSI) or DMSO for 4 hours. Equal amounts of protein isolated from nuclear extracts were used for Western blot to probe for cleaved Notch1 (Val1744).  $\beta$ -actin was the loading control.

**(B)** Normal gross development of mid-gestation Notch1  $\Delta$ TAD/ $\Delta$ TAD embryos. Representative images of E14.5 +/+, +/ $\Delta$ TAD, and  $\Delta$ TAD/ $\Delta$ TAD embryos.

**(C)** Thymuses from E18.5 embryos were isolated from +/+ (n=11), +/ $\Delta$ TAD (n=18), and  $\Delta$ TAD/ $\Delta$ TAD (n=7). Absolute number of thymocytes in E18.5 embryos

**(D)** Representative FACS plots showing percentages T-cells labeling with CD4 and/or CD8 in the +/+, +/ $\Delta$ TAD, or  $\Delta$ TAD/ $\Delta$ TAD thymus.

Figure S2

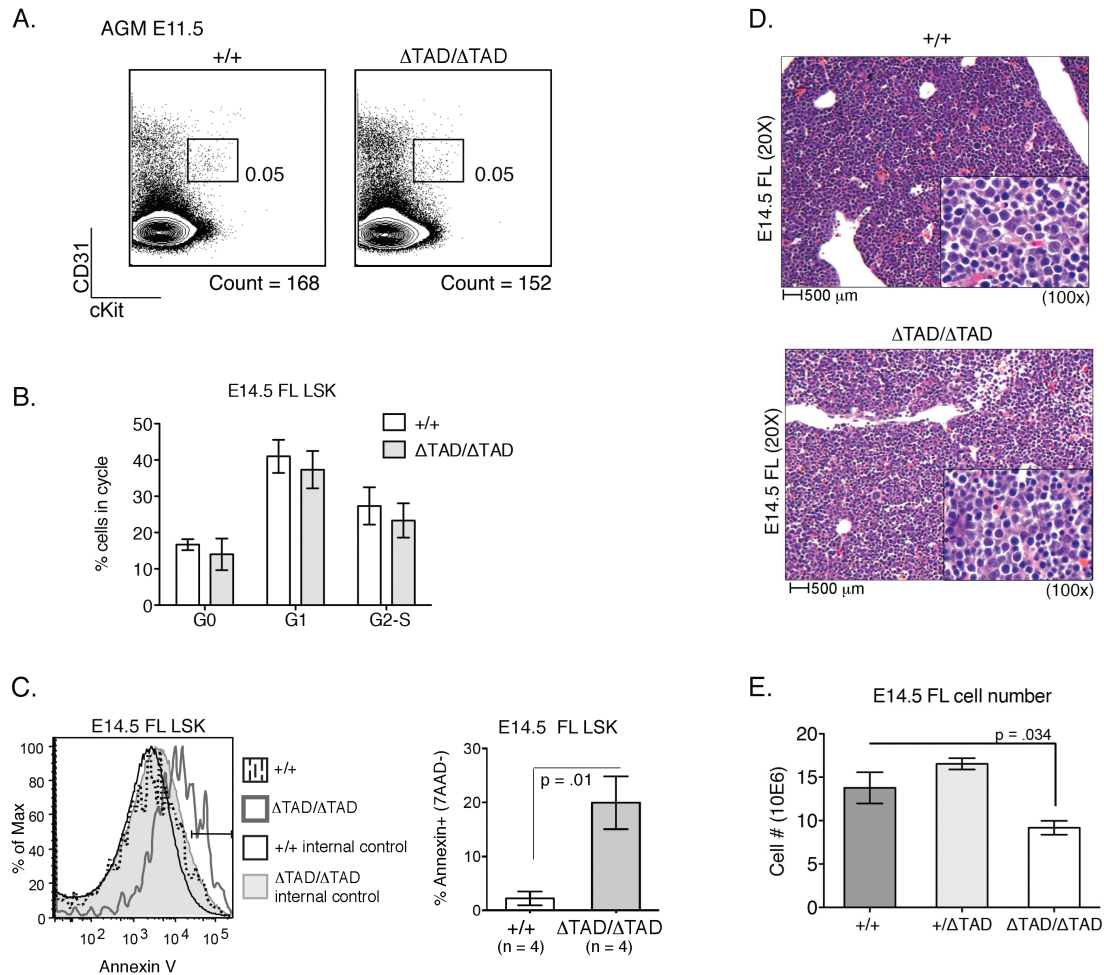

**Figure S2. Characterization of E11.5  $\Delta TAD/\Delta TAD$  AGM cells and E14.5 FL cells.**

(A) Representative flow cytometry plot of cKit and CD31 in E11.5 AGM cells from +/+ and  $\Delta TAD/\Delta TAD$  embryos. HSCs in the E11.5 AGM are found in the CD31<sup>+</sup>cKit<sup>+</sup> population

(B) Cell cycle analysis (using Ki67 and DAPI) of E14.5 FL LSKs from +/+ (n = 4) and  $\Delta TAD/\Delta TAD$  (n = 4)

(C) Increased apoptosis in  $\Delta TAD/\Delta TAD$  E14.5 FL LSKs. Representative flow cytometry plots of Annexin V<sup>+</sup> cells from +/+ (dotted line) and  $\Delta TAD/\Delta TAD$  (bold gray line) E14.5 FL LSKs. Annexin V expression on internal control Lin<sup>+</sup> cells of +/+ (solid black line) and

$\Delta$ TAD/ $\Delta$ TAD (light grey shading) was used to determine the positive gate for Annexin V staining. Bar graph represents the normalized percentage of Annexin V<sup>+</sup> 7AAD<sup>-</sup> cells from E14.5 +/+ and  $\Delta$ TAD/ $\Delta$ TAD FL LSKs (n = 4). Values were determined by subtracting the mean percentage of +/+ Annexin V<sup>+</sup> Lin<sup>+</sup> cells (calculated as % Annexin V<sup>+</sup> cells  $\pm$  SEM, which was  $1.600 \pm 0.147$ , n=4) from the mean percentage of Annexin V<sup>+</sup> +/+ LSKs, and by subtracting the mean percentage of  $\Delta$ TAD/ $\Delta$ TAD Annexin V<sup>+</sup> Lin<sup>+</sup> cells ( $4.025 \pm 0.728$ , n=4) from the mean percentage of Annexin V<sup>+</sup>  $\Delta$ TAD/ $\Delta$ TAD LSKs.

**(D)** H & E staining of +/+ and  $\Delta$ TAD/ $\Delta$ TAD FL. E14.5 FLs were fixed in 4% PFA and embedded in paraffin prior to sectioning. Images are 20x and inset is 100x.

**(E)** Decreased cellularity in  $\Delta$ TAD/ $\Delta$ TAD E14.5 FL. Single cell suspensions were made from individual RBCs lysed E14.5 FLs. All cell counts were performed on a hemocytometer.

Figure S3

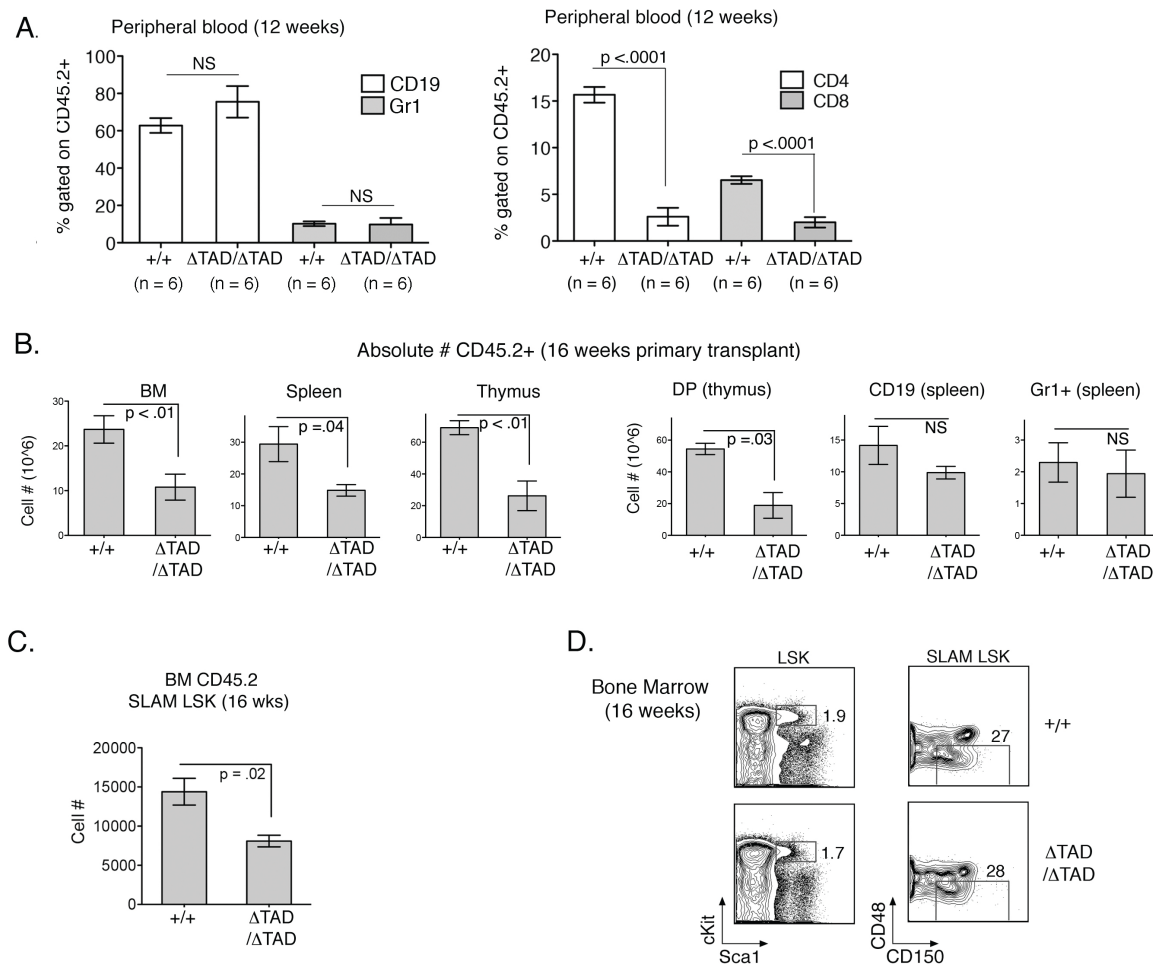

**Figure S3. Hematopoietic development from E14.5  $\Delta TAD/\Delta TAD$  FL cells.**

**(A)** Multi-lineage reconstitution by CD45.2<sup>+</sup> cells measured by expression of CD4, CD8, CD19, Gr1, and CD11b in the peripheral blood at 16 weeks post-transplant of  $\Delta TAD/\Delta TAD$  E14.5 FL cells.

**(B)** Absolute numbers of CD45.2<sup>+</sup> cells in the BM, Spleen and thymus of primary transplant recipients (16 weeks). Absolute numbers of DP (CD4<sup>+</sup>CD8<sup>+</sup>) CD45.2<sup>+</sup> cells in the thymus and CD19<sup>+</sup>CD45.2<sup>+</sup>, Gr1<sup>+</sup>CD45.2<sup>+</sup> cells in spleen of primary transplant recipients 16 weeks post-transplant of  $\Delta TAD/\Delta TAD$  E14.5 FL cells.

**(C)** Absolute numbers of CD45.2<sup>+</sup> SLAM-LSKs in the bone marrow of primary transplant recipients 16 weeks post-transplant with  $\Delta TAD/\Delta TAD$  E14.5 FL cells.

**(D)** Presence of phenotypic HSCs, but no aberrant accumulation of SLAM-LSKs in the

BM following transplant of  $\Delta$ TAD/ $\Delta$ TAD FL cells. Representative FACS plots of LSK and SLAM-LSK populations in the BM at 16 weeks post-transplant of  $\Delta$ TAD/ $\Delta$ TAD E14.5 FL cells.

Figure S4

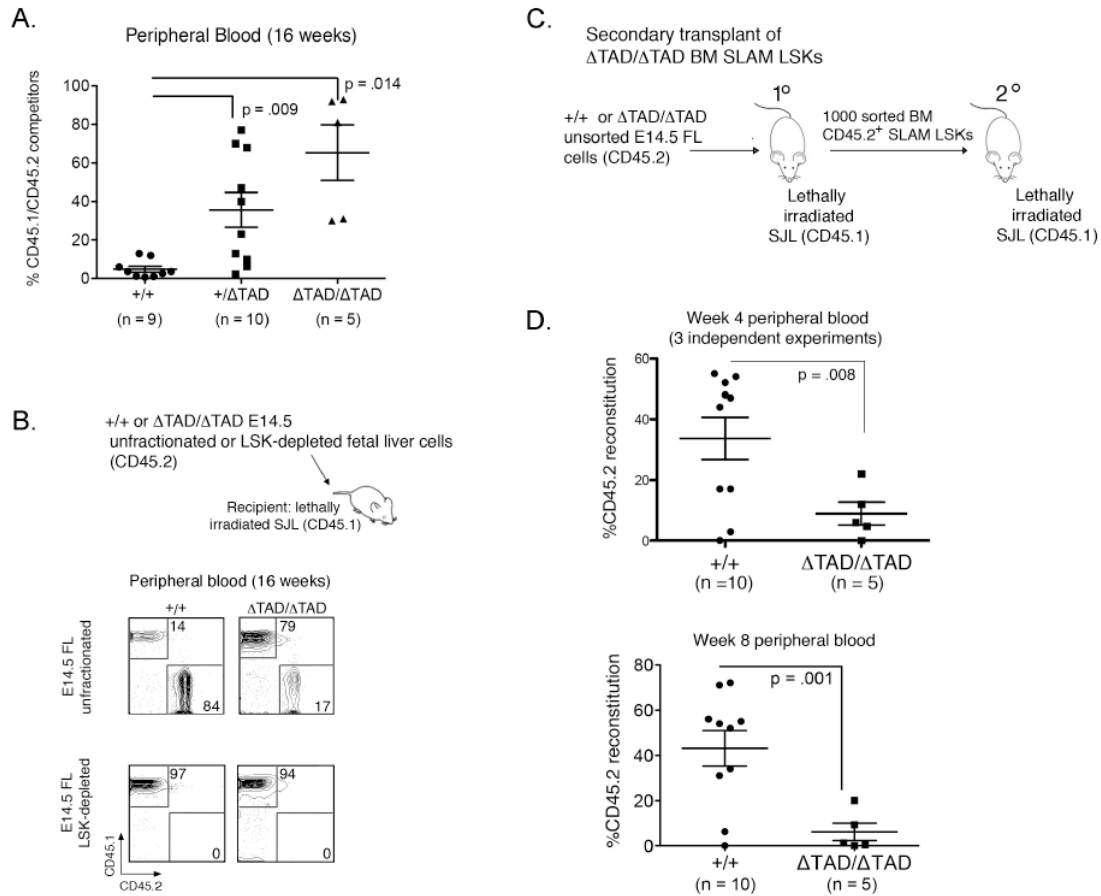

**Figure S4.  $\Delta$ TAD/ $\Delta$ TAD E14.5 FL HSCs are impaired in primary and secondary transplants.**

**(A)** Reconstitution of competitor F1 (CD45.1<sup>+</sup>CD45.2<sup>+</sup>) cells in peripheral blood (16 weeks) of recipients receiving 500 sorted E14.5 FL SLAM-LSKs from +/+, +/ΔTAD or ΔTAD/ΔTAD in competition with 500 sorted BM SLAM-LSKs from F1 competitors

**(B)** Unfractionated or LSK-depleted (by FACS sorting) E14.5 FL cells from +/+ and ΔTAD/ΔTAD embryos were transplanted into lethally irradiated CD45.1 recipients. Long-term reconstitution, measured by flow cytometry of CD45.2<sup>+</sup> cells in peripheral blood was observed in recipients +/+ or ΔTAD/ΔTAD cells. Lin<sup>-</sup>Kit<sup>-</sup>Sca1<sup>-</sup> (LSK-depleted) FL cells were unable to reconstitute irradiated recipients (bottom panel).

**(C)** Schematic for non-competitive secondary transplant of +/+ or ΔTAD/ΔTAD derived

BM SLAM-LSKs. 1000 sorted donor derived CD45.2<sup>+</sup> SLAM-LSKs were harvested from the BM of mice 16 weeks after receiving a primary transplant of  $2 \times 10^6$  +/+ or  $\Delta$ TAD/ $\Delta$ TAD unsorted FL cells (donor cells expressed CD45.2)

**(D)** Reconstitution (measured by % of CD45.2) of the peripheral blood (4 weeks and 8 weeks) of secondary transplant recipients from 3 independent experiments.

Figure S5

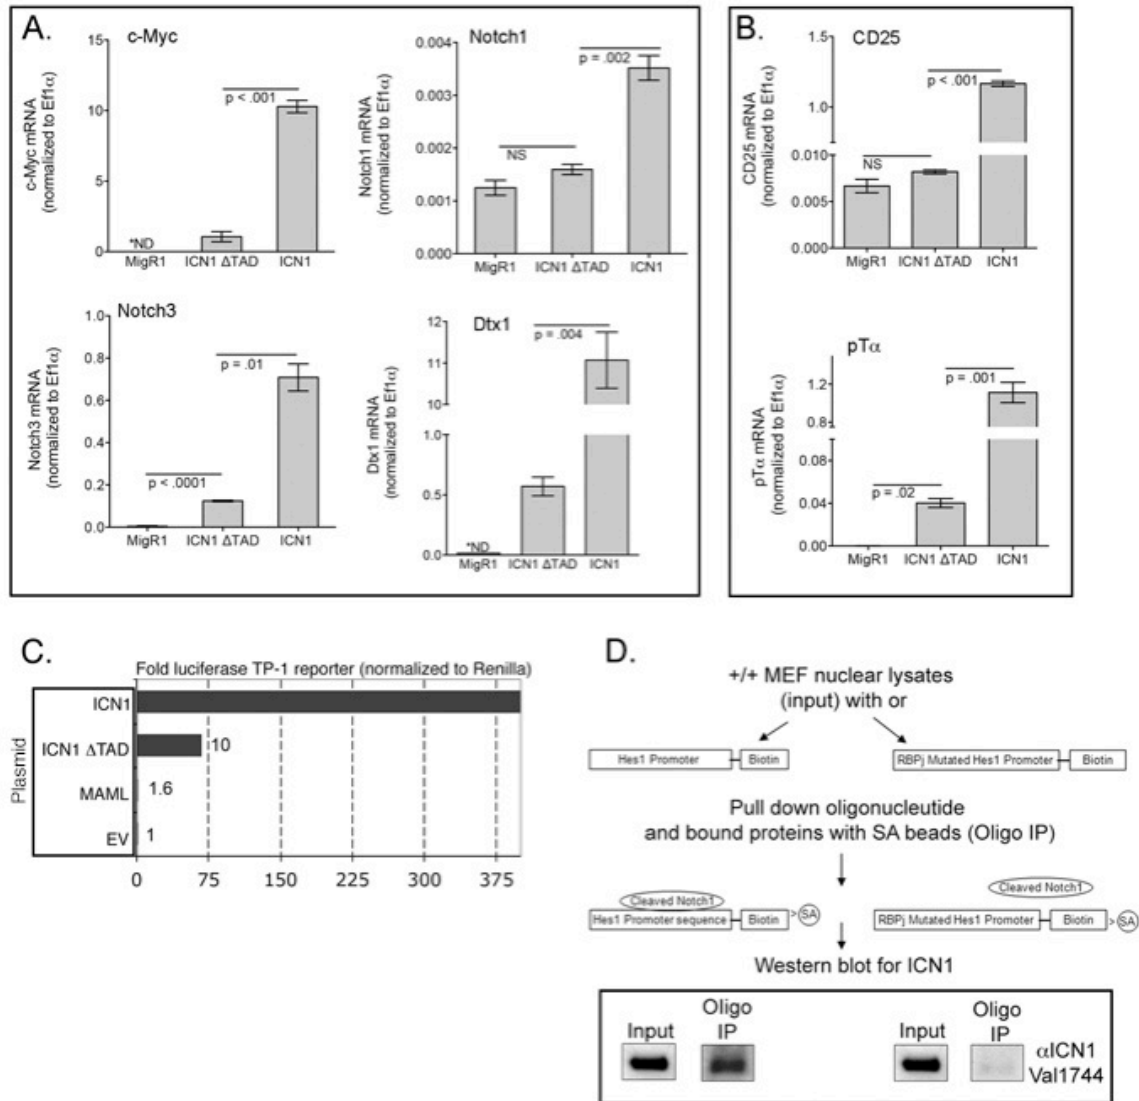

**Figure S5. Notch1 TAD loss impairs transcription and transcriptional complex formation in vitro.**

**(A)** Expression of Notch1, Notch3, c-Myc and Dtx1 in 8946 cells transduced with MigR1 control, ICN1, or ICN1  $\Delta$ TAD. Data is representative of 2 independent experiments 8946 cells were treated with doxycycline for 24hrs prior to mRNA preparation to turn off the human c-Myc transgene.

**(B)** Additional experiment showing expression of CD25 and pTa in 8946 cells.

**(C)** Activation of TP-1 luciferase reporter (12 RBPj binding sites) by ICN1, ICN1  $\Delta$ TAD, MAML1 or empty vector (EV). U2OS cells were transduced with the indicated virus or



empty vector. Luciferase activity was measured 48hrs post transduction and normalized to Renilla.

**(D)** Lack of cleaved Notch1 binding to Hes1 oligonucleotide with mutated RBPj binding sites (Hes1 mutated IP). Nuclear lysate from +/+ MEFs was incubated with either the Hes1 oligonucleotide or the Hes1 mutated oligonucleotide. Cleaved Notch1 expression was observed in +/+ MEFs (left panel) and was pulled down with the Hes1 oligonucleotide, but not with Hes1 mutated oligonucleotide (right panel).



|                                                                                 |                                      |
|---------------------------------------------------------------------------------|--------------------------------------|
|                                                                                 | TTCAGCCAATGGGAGGAAGAGACAC            |
|                                                                                 |                                      |
| <b>Primers for site directed mutagenesis of TAD (including from human ICN1)</b> |                                      |
| Sense                                                                           | CCGTGGACTCCCTGAGCTCAGCAGC            |
| Anti sense                                                                      | CTGGCTGCTGAGCTCAGGGAGTCCA            |
| <b>Genotyping primers</b>                                                       |                                      |
| Notch1 <sup>in32</sup> Forward                                                  | 5' TCT AAG TGC TCC GAG GAG ATC A 3'  |
| Notch1 <sup>in32</sup> (WT allele) Reverse                                      | 5' CAG GGG TTG GAG AGA CAT TCA 3'    |
| Notch1 <sup>in32</sup> (Mutant allele) Reverse                                  | 5' TCG CCT TCT ATC GCC TTC TTG 3'    |
|                                                                                 |                                      |
| TAD forward                                                                     | 5' GTT GTA CAT CTG CCT GAC TGG GG 3' |
| TAD reverse                                                                     | 5' GTG GTA GCA AGG AAG CTA AGG 3'    |
|                                                                                 |                                      |
